# Supplementary material for: Late Holocene climatic variability in Subarctic Canada: Insights from a high-resolution lake record from the central Northwest Territories
Source: PLoS One. 2018 Jun 28;13(6):e0199872. doi: 10.1371/journal.pone.0199872 (PMC6023164; doi:10.1371/journal.pone.0199872)
Supplement: S2 Table — (XLSX) [file pone.0199872.s002.xlsx]

## Sheet: Sheet1
S2 Table. Sedimentological data for the Danny's Lake sediment core
Sample depth (cm)	Modelled age (cal. yr BP)	Coarse silt fraction	Mean particle size (μm)	Sand (%)	Silt (%)	Clay (%)
0.3	-48	0.564775	30.1638	20.274	77.2284	2.49757
0.5	-34.4	0.554923	32.5715	23.2716	74.465	2.26337
0.9	-7.1	0.562289	31.7281	22.0627	75.5939	2.34334
1.3	20.2	0.554586	32.2895	23.1057	74.5729	2.32145
1.7	47.4	0.556778	32.1116	22.7429	74.9312	2.32594
2.1	74.7	0.559716	32.3355	22.8548	74.8603	2.28489
2.5	101.9	0.539185	34.1558	25.3406	72.4207	2.23866
2.9	129.2	0.547349	34.8813	25.6895	72.1792	2.13125
3.3	156.4	0.537755	35.2258	26.1522	71.6705	2.17727
3.7	183.7	0.542559	35.1994	25.802	72.0313	2.1667
4.1	211	0.543747	34.4438	25.4709	72.3404	2.18873
4.5	238.2	0.52541	36.7567	28.1814	69.7132	2.10537
4.7	251.8	0.558869	32.861	23.27	74.4992	2.23082
5.1	276.5	0.52453	35.9824	27.479	70.335	2.18593
5.5	293.4	0.553254	32.519	23.1448	74.5772	2.27797
5.9	310.3	0.559903	32.6272	23.0945	74.7998	2.10565
6.1	318.8	0.585081	29.525	18.429	79.2352	2.33574
6.3	327.3	0.514935	40.4492	29.7403	68.2903	1.96949
6.5	335.7	0.498608	40.2246	31.454	66.4864	2.05958
6.7	344.2	0.528316	36.0544	27.7344	70.0967	2.16896
6.9	352.6	0.525716	35.8087	27.4705	70.3164	2.21315
7.1	361.1	0.557815	32.8287	23.1701	74.5293	2.30055
7.3	369.5	0.540379	35.3972	26.4941	71.3055	2.20043
7.5	378	0.551748	33.2204	24.0227	73.646	2.33129
7.7	386.5	0.550228	33.9776	24.7394	73.0427	2.21788
7.9	394.9	0.523513	35.7731	27.6446	70.1255	2.22994
8.1	403.4	0.539157	35.0026	26.2048	71.6154	2.17983
8.3	411.8	0.52526	36.3576	27.7492	70.0433	2.20754
8.5	420.3	0.566216	32.5683	22.6791	75.0698	2.25109
8.7	428.7	0.539397	34.8113	26.1587	71.6453	2.19605
8.9	437.2	0.536285	33.504	25.11	72.6	2.28995
9.1	445.7	0.531349	35.9223	27.2461	70.6225	2.13143
9.3	454.1	0.548265	34.0102	24.9213	72.8888	2.18983
9.5	462.6	0.546312	33.9403	24.8962	72.8542	2.24957
9.7	471	0.560785	30.901	21.2093	76.3326	2.45813
9.9	479.5	0.569438	31.1083	20.9697	76.5911	2.43919
10.1	489.5	0.551267	32.513	23.3271	74.3388	2.33416
10.3	501	0.543839	33.4146	24.4736	73.1601	2.3663
10.5	512.5	0.555588	30.8938	21.4577	75.9491	2.59317
10.7	524.1	0.54304	33.2866	24.3406	73.2894	2.37001
10.9	535.6	0.550718	32.0902	22.8256	74.6915	2.48283
11.1	547.1	0.549915	31.9661	22.7154	74.8046	2.47997
11.3	558.6	0.55971	31.2637	21.58	75.9501	2.46991
11.5	570.2	0.536014	33.6908	25.0318	72.6125	2.35577
11.7	581.7	0.519319	36.2329	27.4093	70.3108	2.27989
11.9	593.2	0.545249	34.4037	25.2935	72.4881	2.21843
12.1	604.7	0.552386	33.9047	24.4481	73.3648	2.18712
12.3	616.3	0.541435	34.8703	25.6214	72.1274	2.25113
12.5	627.8	0.558088	31.5925	21.9946	75.5213	2.48407
12.7	639.3	0.523432	36.4364	27.6076	70.1141	2.27832
12.9	650.8	0.546951	34.1338	25.1691	72.5842	2.24671
13.1	662.4	0.534423	34.8183	26.0821	71.6393	2.27866
13.3	673.9	0.535623	34.4481	25.438	72.2473	2.31468
13.5	685.4	0.531831	35.137	26.2989	71.3796	2.3215
13.7	697	0.533424	34.1458	25.1561	72.4186	2.42528
13.9	708.5	0.550321	33.0414	23.8114	73.8051	2.38352
14.1	720	0.550199	32.6488	23.3791	74.2283	2.39262
14.3	731.5	0.539053	34.2769	25.2318	72.403	2.36527
14.5	743.1	0.525665	35.4036	26.6918	70.9745	2.33366
14.7	754.6	0.524394	36.1675	27.1822	70.494	2.3238
14.9	766.1	0.533621	33.9692	25.3014	72.2458	2.45279
15.1	775.5	0.508101	37.7064	28.6462	69.0518	2.30207
15.3	782.8	0.534959	34.7419	25.8426	71.8225	2.33486
15.5	790	0.533968	34.1075	25.3168	72.2566	2.42659
15.7	797.3	0.538521	35.1735	26.0419	71.7425	2.21563
15.9	804.5	0.53365	34.8378	26.0368	71.6495	2.3137
16.1	811.8	0.531023	33.1503	24.4791	72.9661	2.5548
16.3	819	0.542883	32.4417	23.4595	74.0184	2.52211
16.5	826.3	0.535839	35.0507	26.1527	71.5671	2.2802
16.7	833.5	0.539539	34.2349	25.1926	72.4469	2.36049
16.9	840.8	0.544325	34.3371	25.2036	72.5324	2.26395
17.1	848	0.528396	34.6928	26.4351	71.3445	2.22038
17.3	855.3	0.537036	34.1496	25.6582	72.1221	2.21961
17.5	862.6	0.524789	34.4013	26.3814	71.3578	2.26079
17.7	869.8	0.513098	34.2875	26.6556	70.8819	2.46252
17.9	877.1	0.541605	31.8766	23.1015	74.3989	2.49959
18.1	884.3	0.537518	31.7971	23.3183	74.224	2.45766
18.3	891.6	0.49629	38.4107	30.5847	67.2052	2.21009
18.5	898.8	0.536631	33.1384	24.6734	72.8794	2.44722
18.7	906.1	0.511505	35.5004	27.811	69.8619	2.32711
18.9	913.3	0.509728	36.3345	28.3747	69.2574	2.36785
19.1	920.6	0.487321	39.1094	31.56	66.2646	2.1754
19.3	927.8	0.485898	38.3431	30.5442	67.0856	2.37023
19.5	935.1	0.512479	35.2428	27.2573	70.3574	2.38528
19.7	942.4	0.496335	36.9501	29.3563	68.3643	2.27949
19.9	949.6	0.512218	37.0974	28.4844	69.3741	2.14153
20.1	957.3	0.50523	35.5861	27.9294	69.6898	2.38087
20.3	965.3	0.498202	37.5247	29.8712	67.8808	2.24803
20.5	973.3	0.520029	33.3275	25.2516	72.2337	2.51465
20.7	981.4	0.527436	34.9916	26.815	70.9206	2.26444
20.9	989.4	0.507418	37.3509	29.2346	68.5747	2.19071
21.1	997.5	0.494862	39.5039	32.0301	65.9845	1.98543
21.3	1005.5	0.507934	36.2506	28.5781	69.1612	2.26074
21.5	1013.5	0.494553	39.8904	32.3187	65.6806	2.00069
21.7	1021.6	0.53732	34.9532	26.5029	71.4038	2.0933
21.9	1029.6	0.503993	37.2905	29.4316	68.3739	2.19457
22.1	1037.6	0.50803	37.2111	29.1992	68.5275	2.27332
22.3	1045.7	0.498901	38.0273	30.4055	67.4192	2.17534
22.5	1053.7	0.511594	36.1782	28.6735	69.1452	2.18129
22.7	1061.8	0.501604	37.6252	30.1862	67.6318	2.18202
22.9	1069.8	0.50186	39.5407	31.6175	66.4136	1.96897
23.1	1077.8	0.511583	36.6982	28.7718	68.902	2.32624
23.3	1085.9	0.519758	36.9835	28.0778	69.748	2.17425
23.5	1093.9	0.476835	42.9192	34.8862	63.2026	1.91126
23.7	1102	0.51797	36.2164	28.2852	69.4779	2.23689
23.9	1110	0.510224	38.6112	30.6838	67.2961	2.02008
24.1	1118	0.483711	39.7497	31.7297	66.0066	2.26372
24.3	1126.1	0.5307	35.5288	27.0442	70.8214	2.13445
24.5	1134.1	0.523049	35.5522	27.3276	70.4337	2.23867
24.7	1142.1	0.515294	37.1077	29.0329	68.8052	2.16191
24.9	1150.2	0.54168	32.3547	23.703	73.8924	2.40459
25.1	1158.3	0.511988	36.3885	28.6682	69.1862	2.1456
25.3	1166.3	0.494408	39.0699	31.3963	66.5251	2.07865
25.5	1174.4	0.50166	37.9412	30.3701	67.5154	2.11444
25.7	1182.5	0.554573	31.9382	22.7595	74.9392	2.30129
25.9	1190.6	0.496242	38.291	30.942	66.9716	2.08635
26.1	1198.7	0.532519	33.7052	25.2127	72.4274	2.35994
26.3	1206.8	0.509292	37.019	29.3573	68.4797	2.16297
26.5	1214.9	0.516267	36.0775	28.0229	69.7523	2.22483
26.7	1223	0.523343	35.9293	27.9292	69.8989	2.17185
26.9	1231.1	0.527048	35.6021	27.7085	70.1578	2.13365
27.1	1239.2	0.554366	32.6822	23.5449	74.2239	2.23121
27.3	1247.3	0.525275	34.4722	26.3994	71.3137	2.28689
27.5	1255.4	0.518542	35.311	27.3782	70.2721	2.34966
27.7	1263.5	0.512671	36.6939	28.9738	68.8683	2.15783
27.9	1271.6	0.502446	37.3893	30.0645	67.7642	2.17133
28.1	1279.7	0.488895	39.228	31.5555	66.2768	2.16768
28.3	1287.8	0.521542	35.7034	27.8832	69.9257	2.19106
28.5	1295.9	0.518015	35.7517	27.8656	69.8668	2.26758
28.7	1304	0.518414	35.2386	27.6417	70.1086	2.24962
28.9	1312.1	0.512754	35.0781	27.5863	70.0661	2.34755
29.1	1320.2	0.519757	35.0358	27.2621	70.4507	2.28726
29.3	1328.3	0.523477	33.1805	25.4566	72.0776	2.46579
29.5	1336.4	0.524324	34.3192	26.4099	71.2543	2.3358
29.7	1344.5	0.518479	36.7592	28.8535	69.0505	2.09597
29.9	1352.6	0.527519	34.9047	27.0426	70.7304	2.22697
30.1	1362.1	0.515072	33.9901	26.2638	71.2934	2.44272
30.3	1372.9	0.528524	34.807	26.5641	71.1671	2.26877
30.5	1383.7	0.522633	35.712	27.6077	70.2349	2.15744
30.7	1394.6	0.459249	41.5505	34.5299	63.324	2.14613
30.9	1405.4	0.470715	39.6446	32.4736	65.2537	2.27264
31.1	1416.2	0.527804	33.7742	25.7336	71.8967	2.36964
31.3	1427.1	0.564079	30.538	20.7593	76.8581	2.38255
31.5	1437.9	0.557544	31.9655	22.6171	74.9846	2.39828
31.7	1448.7	0.537481	32.7208	24.3523	73.1851	2.46256
31.9	1459.5	0.525038	35.1386	27.1571	70.5279	2.31501
32.1	1470.4	0.531645	34.2233	26.1149	71.5456	2.3395
32.3	1481.2	0.524856	33.7097	26.0491	71.5442	2.40668
32.5	1492	0.530779	34.1019	25.9075	71.8332	2.25931
32.7	1502.9	0.543571	33.0535	24.472	73.1595	2.36851
32.9	1513.7	0.528209	34.4175	26.5804	71.0957	2.32391
33.1	1524.5	0.530685	35.6042	27.8413	69.9806	2.17805
33.3	1535.3	0.553359	32.4059	23.3971	74.3274	2.27547
33.5	1546.2	0.550651	32.246	23.354	74.3195	2.32646
33.7	1557	0.519462	36.3249	28.1111	69.7224	2.16652
33.9	1567.8	0.533262	34.0832	25.7401	71.9809	2.27901
34.1	1578.7	0.549109	32.1263	23.2659	74.3538	2.38025
34.3	1589.5	0.538876	32.6495	24.2174	73.3756	2.40704
34.5	1600.3	0.548416	32.272	23.3935	74.1811	2.42538
34.7	1611.1	0.535692	32.0748	23.8862	73.6285	2.48529
34.9	1622	0.527629	33.3435	25.6746	71.9588	2.36658
35.1	1634.9	0.527932	33.3959	25.5871	72.019	2.39391
35.3	1650	0.538228	34.7561	26.3383	71.4434	2.21833
35.5	1665.1	0.551072	31.904	22.9917	74.6369	2.37142
35.7	1680.2	0.53054	33.2066	25.2911	72.3184	2.39049
35.9	1695.3	0.53788	33.4641	25.1682	72.5511	2.28077
36.1	1710.4	0.525945	34.2057	26.6684	71.0155	2.3161
36.3	1725.4	0.595151	29.6988	18.0678	79.5441	2.3881
36.5	1740.5	0.543345	31.4949	23.0116	74.3961	2.59227
36.7	1755.6	0.51133	36.5055	28.7627	68.9144	2.32295
36.9	1770.7	0.536734	32.6242	24.1411	73.353	2.50589
37.1	1785.8	0.551645	30.9681	21.9035	75.5406	2.55599
37.3	1800.9	0.542881	30.5751	22.0542	75.2472	2.69858
37.5	1815.9	0.554138	29.8202	20.6572	76.6902	2.65259
37.7	1831	0.543067	32.3179	23.6639	73.9838	2.35223
37.9	1846.1	0.567222	29.2983	19.3856	77.9827	2.63173
38.1	1861.2	0.526488	34.4485	26.6238	71.0092	2.36702
38.3	1876.3	0.52907	31.8553	24.0227	73.3952	2.58204
38.5	1891.4	0.542738	28.9005	20.3079	76.8368	2.85528
38.7	1906.5	0.551954	30.982	21.9544	75.5237	2.52189
38.9	1921.5	0.567197	29.9759	20.1322	77.3522	2.5156
39.1	1936.6	0.507926	35.1753	27.8693	69.7556	2.3751
39.3	1951.7	0.470553	35.2925	29.7515	67.6028	2.64573
39.5	1966.8	0.513042	32.8732	25.6943	71.7266	2.5791
39.7	1981.9	0.533778	32.2452	24.3362	73.2388	2.42502
39.9	1997	0.533157	32.518	24.4838	73.0828	2.43336
40.1	2010.9	0.508049	35.2142	28.1234	69.5815	2.2951
40.3	2023.8	0.495956	33.888	27.2487	70.169	2.58225
40.5	2036.7	0.506183	28.032	21.4512	75.5519	2.99695
40.7	2049.5	0.504027	32.7536	25.9236	71.3544	2.72204
40.9	2062.4	0.513966	28.476	21.3986	75.5283	3.07308
41.1	2075.2	0.520686	31.5093	23.8321	73.5729	2.59507
41.3	2088.1	0.511629	31.6473	24.6953	72.6472	2.65749
41.5	2101	0.539864	31.4633	23.1521	74.4023	2.44557
41.7	2113.8	0.555396	30.4822	21.2935	76.2044	2.50214
41.9	2126.7	0.551442	32.2718	23.319	74.2993	2.38173
42.1	2139.5	0.51446	36.1362	28.5064	69.278	2.21558
42.3	2152.4	0.514583	34.4022	27.1688	70.4993	2.3319
42.5	2165.3	0.526255	34.1276	26.3998	71.3244	2.27581
42.7	2178.1	0.504724	33.3362	26.6605	70.8321	2.5074
42.9	2191	0.531571	31.4224	23.4649	74.0206	2.51451
43.1	2203.8	0.523511	34.2479	26.7754	70.9687	2.25598
43.3	2216.7	0.538976	31.78	23.5117	74.0154	2.47283
43.5	2229.6	0.579196	28.8995	18.1793	79.2648	2.55583
43.7	2242.4	0.545244	32.7541	24.1674	73.4824	2.35025
43.9	2255.3	0.545223	32.613	23.9554	73.621	2.42355
44.1	2268.1	0.530609	34.061	26.0299	71.642	2.32804
44.3	2281	0.530341	33.5897	25.6468	71.9691	2.38415
44.5	2293.9	0.526078	32.7266	24.9281	72.5341	2.53779
44.7	2306.7	0.579146	28.2722	17.4498	79.9298	2.62045
44.9	2319.6	0.539066	32.1236	23.8179	73.7103	2.47181
45.1	2335.6	0.554067	30.7047	21.4989	75.9985	2.50261
45.3	2354.8	0.557023	32.3289	23.1791	74.6849	2.13599
45.5	2373.9	0.561397	32.2258	22.7821	74.9528	2.26513
45.7	2393.1	0.531782	34.3962	26.5117	71.2387	2.24966
45.9	2412.3	0.529438	34.2968	26.5064	71.2378	2.25583
46.1	2431.5	0.534911	33.1332	25.1273	72.5202	2.35249
46.3	2450.7	0.524655	33.6221	26.067	71.5808	2.35224
46.5	2469.8	0.560217	32.0076	22.6949	75.025	2.28016
46.7	2489	0.551048	31.5568	22.7073	74.9146	2.37806
46.9	2508.2	0.541523	31.8085	23.5148	74.029	2.45619
47.1	2527.4	0.549334	32.2136	23.3629	74.2473	2.38985
47.3	2546.5	0.567765	30.0838	20.1855	77.2897	2.52489
47.5	2565.7	0.5436	32.2638	23.8319	73.7249	2.44325
47.7	2584.9	0.56587	29.4834	19.6981	77.6504	2.65149
47.9	2604.1	0.572903	29.2564	19	78.5248	2.47515
48.1	2623.2	0.52024	35.5009	28.0132	69.8086	2.17826
48.3	2642.4	0.552676	30.5012	21.4941	76.0882	2.41772
48.5	2661.6	0.514082	35.5845	28.2038	69.5432	2.253
48.7	2680.8	0.547324	32.8558	24.2087	73.5053	2.28605
48.9	2700	0.563163	30.0414	20.4783	77.1002	2.42155
49.1	2719.1	0.562619	31.1386	21.6205	76.0632	2.31621
49.3	2738.3	0.558999	32.2406	23.0531	74.8756	2.07132
49.5	2757.5	0.56374	30.4633	20.8723	76.7699	2.3578
49.7	2776.7	0.549837	32.0473	23.3591	74.4928	2.14804
49.9	2795.8	0.5511	31.5125	22.6815	75.0254	2.29307
50.1	2814.1	0.554399	31.2862	22.2648	75.4186	2.31663
50.3	2831.4	0.550698	31.9894	23.177	74.4767	2.34626
50.5	2848.8	0.531858	32.9427	24.9464	72.7632	2.29041
50.7	2866.1	0.546622	32.2617	23.6964	73.9578	2.3458
50.9	2883.5	0.553511	32.0587	23.0644	74.5936	2.34195
51.1	2900.8	0.540934	33.2253	24.8857	72.7585	2.3558
51.3	2918.2	0.53804	33.8689	25.6081	72.093	2.29893
51.5	2935.5	0.53036	34.5028	26.6145	71.1344	2.2511
51.7	2952.9	0.517286	36.9826	29.526	68.4128	2.0612
51.9	2970.2	0.539575	32.5333	24.2054	73.4277	2.36694
52.1	2987.5	0.543598	33.952	25.3628	72.3994	2.23786
52.3	3004.9	0.548059	33.5488	24.7601	72.9808	2.25912
52.5	3022.2	0.542769	33.502	24.9543	72.7263	2.31945
52.7	3039.6	0.553834	33.6872	24.6569	73.1978	2.14527
52.9	3056.9	0.544144	34.8538	26.2375	71.692	2.07042
53.1	3074.3	0.553939	33.4444	24.3563	73.4375	2.20622
53.3	3091.6	0.547366	33.0116	24.2483	73.4275	2.32421
53.5	3109	0.561257	32.2154	22.7538	74.9856	2.2606
53.7	3126.3	0.541157	33.7007	25.2947	72.5059	2.19936
53.9	3143.6	0.547347	32.1615	23.5054	74.1388	2.35585
54.1	3161	0.561509	32.4153	22.9534	74.7784	2.26812
54.3	3178.3	0.557712	31.8663	22.6035	74.9243	2.47217
54.5	3195.7	0.556494	32.4378	23.2586	74.3595	2.38186
54.7	3213	0.541628	33.261	24.9039	72.8398	2.25631
54.9	3230.4	0.551739	31.8896	22.951	74.5879	2.46109
55.1	3246.2	0.571461	29.6444	19.5814	77.8001	2.6185
55.3	3260.6	0.558239	32.2092	22.9979	74.7711	2.23095
55.5	3275	0.562398	31.2054	21.6952	75.8944	2.41046
55.7	3289.4	0.560365	30.9314	21.4689	75.9925	2.53868
55.9	3303.8	0.565151	31.2583	21.5634	76.0037	2.43293
56.1	3318.1	0.569068	31.8069	21.9306	75.8078	2.26159
56.3	3332.5	0.565507	30.4367	20.6708	76.7713	2.55782
